# Supplementary material for: Spatiotemporal mapping of RNA editing in the developing mouse brain using in situ sequencing reveals regional and cell-type-specific regulation
Source: PubMed Central journal article supplement (PMC6961268; doi:10.1186/s12915-019-0736-3), 2020-01-14

Figure S1. Spatial distribution of marker transcripts.

Interneuron

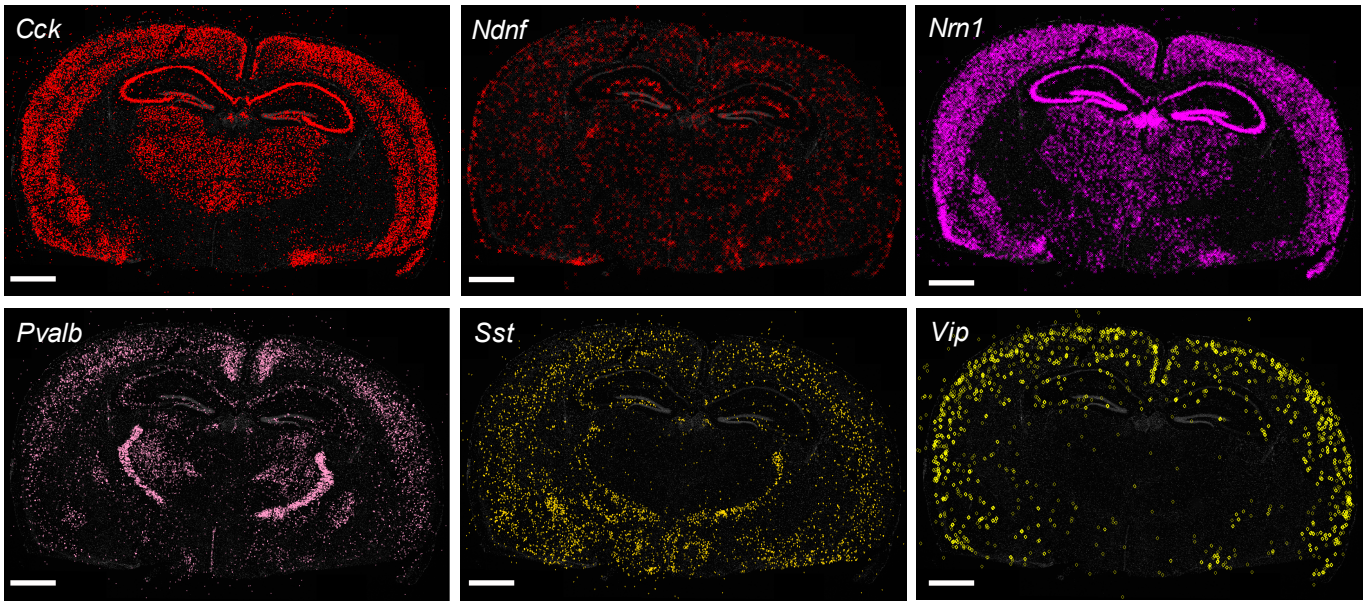

Pyramidal neuron

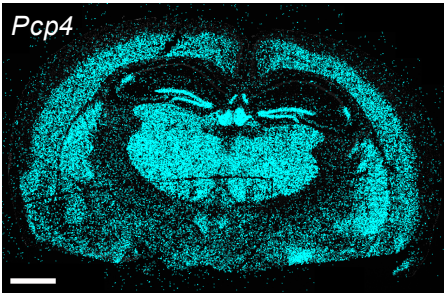

Oligodendrocyte

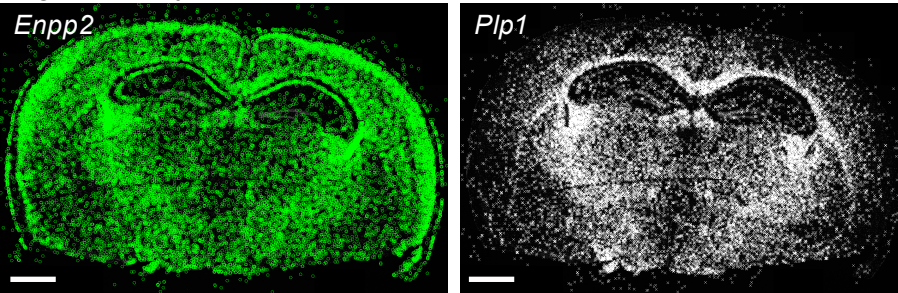

Astrocyte

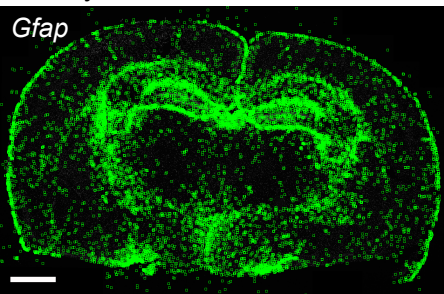

Supplement: 12915_2019_736_MOESM3_ESM.pdf [file 12915_2019_736_MOESM3_ESM.pdf]
